# Supplementary material for: The asymmetric total synthesis of (+)-N-acetyl norloline
Source: Royal Society of Chemistry journal article supplement (doi:10.1039/c5cc07480k), 2015-10-26

## Electronic Supplementary Information

### Asymmetric Total Synthesis of (+)-*N*-Acetyl Norloline

Jian-Liang Ye,<sup>a,\*</sup> Yang Liu,<sup>a</sup> Zhi-Ping Yang<sup>a</sup> and Pei-Qiang Huang<sup>a,b,\*</sup>

<sup>a</sup> *Department of Chemistry, Fujian Provincial Key Laboratory of Chemical Biology, iChEM (Collaborative Innovation Center of Chemistry for Energy Materials), College of Chemistry and Chemical Engineering, Xiamen University, Xiamen, Fujian 361005, P. R. China*

<sup>b</sup> *The State Key Laboratory of Elemento-Organic Chemistry, Nankai University, Tianjin 300071, P. R. China.*

Email: [pqhuang@xmu.edu.cn](mailto:pqhuang@xmu.edu.cn); yejl@xmu.edu.cn

#### Contents (24 pages)

- Experimental procedures for the synthesis of compounds **3**, **11**, **13-17**, **19-20** (pp. 2-10)
- Table **1** and **2**, <sup>1</sup>H and <sup>13</sup>C NMR data for (+)-*N*-acetyl norloline (**3**) (pp. 11-12)
- References (pp. 13)
- <sup>1</sup>H and <sup>13</sup>C NMR spectra of compounds **3**, **9**, **11**, **13-17**, **19-20** (pp. 14-23)
- X-ray structure of compound **13** (pp. 24)

**General Methods.** Melting points were uncorrected. Infrared spectra were measured using film KBr pellet techniques. NMR spectra were recorded in CDCl<sub>3</sub> with tetramethylsilane (<sup>1</sup>H) and CDCl<sub>3</sub> (<sup>13</sup>C) as an internal standard. Chemical shifts are expressed in δ (ppm) units relative to TMS (0 ppm, <sup>1</sup>H) and CDCl<sub>3</sub> (77 ppm, <sup>13</sup>C). Mass Spectra were obtained using electrospray ionization and an ICR analyzer (ESI-MS) for high resolution mass spectra (HRMS). Silica gel (300-400 mesh) was used for flash column chromatography, eluting (unless otherwise stated) with ethyl acetate/ hexane. Ether and THF were distilled over sodium and benzophenone under Ar. Dichloromethane and was distilled over calcium hydride under Ar.

***tert*-Butyl (*R*)-2-((*S*)-((*tert*-butyldimethylsilyl)oxy)((*R*)-2,2-dimethyl-1,3-dioxolan-4-yl)methyl)-5-oxo-2,5-dihydro-1*H*-pyrrole-1-carboxylate (**11**)**

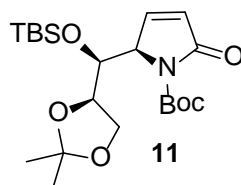

To a solution of the known lactam **9** (626 mg, 2.00 mmol, 1.0 equiv), prepared by the Rassu/ Casiraghi's vinylogous Mukaiyama-type aldol reaction,<sup>[1]</sup> in dry DMF (10 mL) at 0 °C under argon atmosphere were added TBSCl (3.02 g, 20.0 mmol, 10.0 equiv) and imidazole (1.36 g, 20.0 mmol, 10.0 equiv). The mixture was allowed to warm to 5 °C. After being stirred for 12 h, two other portions of TBSCl (2 × 755 mg, 2 × 5.00 mmol, 2.5 equiv) and imidazole (2 × 340 mg, 2 × 5.00 mmol, 2.5 equiv) were added. After being stirred at 5 °C for an additional 20 h, the mixture was quenched with 5% aqueous citric acid (20 mL). The resulting slurry was extracted with Et<sub>2</sub>O (3 × 20 mL) and the combined organic layers were washed with brine, dried over anhydrous Na<sub>2</sub>SO<sub>4</sub>, filtered, and concentrated under reduced pressure. The residue was purified by flash chromatography on silica gel (eluent: EtOAc/ Hexane = 1:10) to give the known compound **11**<sup>[2]</sup> (700 mg, yield: 82%). Mp: 140-142 °C; [α]<sub>D</sub><sup>20</sup> +179.2 (*c* 1.0, CHCl<sub>3</sub>); {lit.<sup>[2]</sup>: Mp: 140-142 °C; [α]<sub>D</sub><sup>20</sup> +180.4 (*c* 0.92, CHCl<sub>3</sub>)} IR (film) ν<sub>max</sub>: 2983, 2955, 2931, 2858, 2357, 1789, 1748, 1713, 1700, 1369, 1320, 1255, 1159, 1095, 1076,

838  $\text{cm}^{-1}$ ;  $^1\text{H}$  NMR (400 MHz,  $\text{CDCl}_3$ )  $\delta$  0.16 (s, 3H), 0.21 (s, 3H), 0.93 (s, 9H), 1.24 (s, 3H), 1.35 (s, 3H), 1.58 (s, 9H), 3.65-3.72 (m, 1H), 3.73-3.80 (m, 1H), 4.60 (br t,  $J = 4.7$  Hz, 1H), 4.63-4.67 (m, 1H), 6.19 (dd,  $J = 6.1, 1.4$  Hz, 1H), 7.28 (dd,  $J = 6.1, 1.9$  Hz, 1H);  $^{13}\text{C}$  NMR (100 MHz,  $\text{CDCl}_3$ )  $\delta$  -4.8, -4.4, 17.8, 24.9, 25.6 (3C), 26.3, 28.2 (3C), 65.1, 66.0, 71.1, 74.7, 83.2, 108.9, 128.3, 147.3, 149.2, 168.8. HRMS calcd for  $\text{C}_{15}\text{H}_{23}\text{NO}_6\text{Na}$   $[\text{M}+\text{Na}]^+$ : 450.2282; found: 450.2288.

***tert*-Butyl (2*R*,3*S*,3*aR*,6*aS*)-3-((*tert*-butyldimethylsilyloxy)-2-(hydroxymethyl)-5-oxotetrahydro-2*H*-furo[3,2-*b*]pyrrole-4(5*H*)-carboxylate (13)**

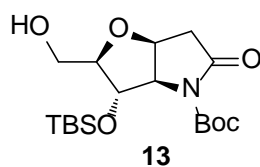

To a solution of compound **11** (427 mg, 1.00 mmol, 1.0 equiv) in MeOH (20 mL) at 0 °C was added 2 N HCl (0.2 mL) dropwise. After being stirred for 10 min at the same temperature, the reaction was allowed to warm to room temperature and stirred for 10 h. Then the reaction was quenched with a saturated aqueous  $\text{NaHCO}_3$  (5 mL) and the aqueous layer was extracted with  $\text{CH}_2\text{Cl}_2$  (3  $\times$  20 mL). The combined organic layers were washed with brine, dried over anhydrous  $\text{Na}_2\text{SO}_4$ , filtered, and concentrated under reduced pressure. The residue was used in the next step without further purification.

Then the resulting residue was dissolved in anhydrous THF (20 mL) at 0 °C and DBU (0.22 mL, 1.50 mmol, 1.5 equiv) was added dropwise. After being stirred for 20 min at the same temperature, the reaction allowed to warm to room temperature and stirred for 6 h. Then the mixture was concentrated under reduced pressure. The resulting residue was purified by flash chromatography on silica gel (eluent: EtOAc / Hexane = 1:1) to give compound **13** (271 mg, yield: 70%) as a white solid. Mp: 100-101 °C;  $[\alpha]_D^{20} +50.7$  ( $c$  1.0,  $\text{CHCl}_3$ ); IR (film)  $\nu_{\text{max}}$ : 3445, 2958, 2929, 2856, 1770, 1759, 1369, 1247, 1153, 1064, 838, 773  $\text{cm}^{-1}$ ;  $^1\text{H}$  NMR (400 MHz,  $\text{CDCl}_3$ )  $\delta$  0.11 (s, 3H), 0.18 (s, 3H), 0.90 (s, 9H) 1.55 (s, 9H), 2.22 (br s, 1H), 2.58-2.72 (m, 2H), 3.56 (dd,  $J = 11.6$

Hz, 4.8 Hz, 1H), 3.71 (dd,  $J = 11.6$  Hz, 2.4 Hz, 1H), 3.80-3.92 (m, 1H), 4.24 (d,  $J = 4.8$  Hz, 1H), 4.34 (d,  $J = 3.8$  Hz, 1H), 4.63-4.69 (m, 1H);  $^{13}\text{C}$  NMR (100 MHz,  $\text{CDCl}_3$ )  $\delta$  -5.3, -4.6, 17.8, 25.7 (3C), 27.9 (3C), 39.1, 62.3, 71.2, 73.3, 77.0, 83.5, 88.3, 150.5, 171.6; HRMS calcd for  $\text{C}_{18}\text{H}_{33}\text{N}_2\text{O}_6\text{SiNa}$   $[\text{M}+\text{Na}]^+$ : 410.1969; found: 410.1973.

***tert*-Butyl (2*R*,3*S*,3*aR*,6*aS*)-3-((*tert*-butyldimethylsilyl)oxy)-2-(hydroxymethyl)-tetrahydro-2*H*-furo[3,2-*b*]pyrrole-4(5*H*)-carboxylate (**14**)**

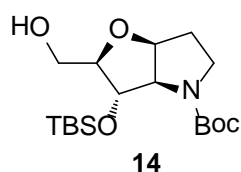

To a solution of compound **13** (120 mg, 0.31 mmol, 1.0 equiv) in anhydrous THF (15 mL) at 0 °C was added borane dimethylsulfide (2.0 M in THF, 0.47 mL, 0.93 mmol, 3.0 equiv) via syringe. The mixture was heated to reflux for 2 h. Then the reaction was cooled to room temperature and quenched with a saturated aqueous  $\text{NH}_4\text{Cl}$  (4 mL) and the aqueous layer was extracted with  $\text{Et}_2\text{O}$  ( $3 \times 15$  mL). The combined organic layers were washed with brine, dried over anhydrous  $\text{Na}_2\text{SO}_4$ , filtered, and concentrated under reduced pressure. The residue was purified by flash chromatography on silica gel (eluent:  $\text{EtOAc}/\text{Hexane} = 1:2$ ) to give compound **14** (98 mg, yield: 85%) as a white solid. Mp: 91-92 °C.  $[\alpha]_{\text{D}}^{20} +73.3$  ( $c$  1.0,  $\text{CHCl}_3$ ); IR (film)  $\nu_{\text{max}}$ : 3445, 2954, 2930, 2857, 1698, 1682, 1473, 1463, 1397, 1367, 1252, 1225, 1111, 1046, 857  $\text{cm}^{-1}$ ;  $^1\text{H}$  NMR (500 MHz,  $\text{CDCl}_3$ , mixture of rotamers)  $\delta$  0.11 and 0.19 (br 2s, 6H), 0.89 (s, 9H), 1.47 (s, 9H), 1.72-1.84 (m, 1H), 1.91-2.06 (m, 2H), 3.14-3.38 (m, 1H), 3.49 (dd,  $J = 11.3, 7.4$  Hz, 1H), 3.53-3.83 (m, 2H), 3.92 and 3.96 (br 2s, 2H), 4.22 (br s, 1H), 4.69-4.96 (m, 1H);  $^{13}\text{C}$  NMR (125 MHz,  $\text{CDCl}_3$ , mixture of rotamers)  $\delta$  -5.3, -4.5, 17.8, 25.7 (3C), 28.4 (3C), 29.7, 30.3, 45.3, 63.0, 70.7, 77.4, 79.4, 80.4, 82.5, 83.7, 88.6, 154.1; HRMS calcd for  $\text{C}_{18}\text{H}_{35}\text{NO}_5\text{SiNa}$   $[\text{M}+\text{Na}]^+$ : 396.2177; found: 396.2177.

***tert*-Butyl (2*R*,3*S*,3*aR*,6*aS*)-2-((benzyloxy)methyl)-3-((*tert*-butyldimethylsilyl)oxy)tetrahydro-2*H*-furo[3,2-*b*] pyrrole-4(5*H*)-carboxylate (15)**

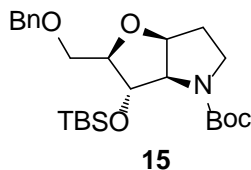

To a suspension of NaH (37 mg, 0.92 mmol, 3.0 equiv) and TBAI (11 mg, 0.031 mmol, 0.1 equiv) in anhydrous THF (8 mL) at 0 °C was added a solution of compound **14** (115 mg, 0.308 mmol, 1.0 equiv) in anhydrous THF (2 mL). After 10 min of stirring at 0 °C, BnBr (73  $\mu$ L, 0.62 mmol, 2.0 equiv) was added, and the reaction was heated to 40 °C and stirred for 3 h. Then the reaction was quenched with H<sub>2</sub>O (3 mL) and the aqueous layer was extracted with EtOAc (3  $\times$  10 mL). The combined organic layers were washed with brine, dried over anhydrous Na<sub>2</sub>SO<sub>4</sub>, filtered, and concentrated under reduced pressure. The residue was purified by flash chromatography on silica gel (eluent: EtOAc/ Hexane = 1:5) to give compound **15** (137 mg, yield: 96%) as a colorless oil.  $[\alpha]_D^{20} +62.5$  (*c* 1.0, CHCl<sub>3</sub>); IR (film)  $\nu_{\max}$ : 2954, 2929, 2892, 2856, 2363, 1768, 1697, 1476, 1393, 1366, 1250, 1176, 1105, 1045, 1028, 837 cm<sup>-1</sup>; <sup>1</sup>H NMR (500 MHz, CDCl<sub>3</sub>, mixture of rotamers)  $\delta$  0.04-0.19 (m, 6H), 0.86 (s, 9H), 1.44 and 1.49 (br 2s, 9H), 1.70-1.78 (m, 1H), 1.98-2.06 (m, 1H), 3.18-3.29 (m, 1H), 3.30-3.48 (m, 2H), 3.48-3.58 (m, 0.6H), 3.70 (t, *J* = 9.3 Hz, 0.4H), 3.88 and 3.93 (br 2s, 1H), 3.98 and 4.06 (br 2s, 1H), 4.24 and 4.37 (br 2s, 1H), 4.47-4.60 (m, 2H), 4.73 and 4.79 (br 2s, 1H), 7.23-7.38 (m, 5H); <sup>13</sup>C NMR (125 MHz, CDCl<sub>3</sub>, mixture of rotamers)  $\delta$  -5.3, -4.5, 17.8, 25.6 (3C), 25.8 (3C), 28.4 (3C), 28.7 (3C), 29.7, 30.3, 45.2, 45.5, 70.3, 70.4, 70.5, 73.2, 78.1, 78.4, 79.1, 80.1, 82.6, 83.7, 87.0, 87.2, 127.5, 127.6, 128.1, 128.3, 138.1, 154.1, 154.3; HRMS calcd for C<sub>25</sub>H<sub>41</sub>NO<sub>5</sub>SiNa [M+Na]<sup>+</sup>: 486.2646; found: 486.2650.

***tert*-Butyl (2*R*,3*S*,3*aS*,6*aS*)-2-((benzyloxy)methyl)-3-hydroxytetrahydro-2*H*-furo[3,2-*b*]pyrrole-4(5*H*)-carboxylate (16)**

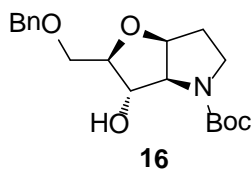

To a solution of compound **15** (137 mg, 0.296 mmol, 1.0 equiv) in anhydrous THF (8 mL) at 0 °C was added TBAF (1.0 M in THF, 0.45 mL, 0.45 mmol, 1.5 equiv) dropwise. After being stirred for 30 min at the same temperature, the reaction was allowed to warm to room temperature and stirred for 4 h. Then the reaction was quenched with a saturated aqueous NH<sub>4</sub>Cl (3 mL) and the aqueous layer was extracted with EtOAc (3 × 10 mL). The combined organic layers were washed with brine, dried over anhydrous Na<sub>2</sub>SO<sub>4</sub>, filtered, and concentrated under reduced pressure. The residue was purified by flash chromatography on silica gel (eluent: EtOAc/ Hexane = 3:2) to give compound **16** (97 mg, yield: 94%) as a colorless oil.  $[\alpha]_D^{20} +86.2$  (*c* 1.0, CHCl<sub>3</sub>); IR (film)  $\nu_{\text{max}}$ : 3418, 2995, 1770, 1384, 1241, 1058 cm<sup>-1</sup>; <sup>1</sup>H NMR (500 MHz, CDCl<sub>3</sub>, mixture of rotamers)  $\delta$  1.46 and 1.50 (br 2s, 9H), 1.79-1.95 (m, 1H), 2.00-2.11 (m, 1H), 2.32 (d, *J* = 2.3 Hz, 0.33H), 3.21 (br s, 0.63H), 3.29-3.39 (m, 1H), 3.47-3.72 (m, 3H), 3.84-3.97 (m, 2H), 3.98-4.10 (m, 1H), 4.54-4.64 (m, 2H), 4.66-4.74 (m, 1H), 7.24-7.38 (m, 5H); <sup>13</sup>C NMR (125 MHz, CDCl<sub>3</sub>, mixture of rotamers)  $\delta$  28.4 (3C), 28.5 (3C), 29.8, 30.5, 44.5, 45.0, 70.2, 70.3, 70.8, 71.1, 73.3, 73.4, 79.1, 78.0, 80.0, 80.2, 81.6, 82.9, 84.5, 84.8, 127.5, 127.6, 127.7, 128.2, 128.3, 137.8, 138.0, 153.7, 155.0; HRMS calcd for C<sub>19</sub>H<sub>27</sub>NO<sub>5</sub>Na [M+Na]<sup>+</sup>: 372.1781; found: 372.1779.

***tert*-Butyl (2*R*,3*aR*,6*aS*)-2-((benzyloxy)methyl)-3-oxotetrahydro-2*H*-furo[3,2-*b*]pyrrole-4(5*H*)-carboxylate (17)**

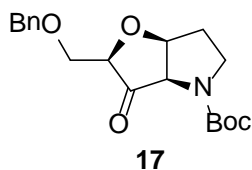

To a solution of oxalyl chloride (0.09 mL, 1.0 mmol, 2.0 equiv) in anhydrous CH<sub>2</sub>Cl<sub>2</sub> (5 mL) at -78 °C was added DMSO (0.14 mL, 2.0 mmol, 4.0 equiv) dropwise. After

30 min of stirring at  $-78\text{ }^{\circ}\text{C}$ , a solution of compound **16** (175 mg, 0.501 mmol, 1.0 equiv) in  $\text{CH}_2\text{Cl}_2$  (1 mL) was added dropwise. After being stirred for 1 h at  $-78\text{ }^{\circ}\text{C}$  was added  $\text{Et}_3\text{N}$  (0.55 mL, 4.01 mmol, 8.0 equiv), then the reaction was warmed to  $0\text{ }^{\circ}\text{C}$  and stirred for 1 h. The reaction was quenched with  $\text{H}_2\text{O}$  (2 mL) and the aqueous layer was extracted with  $\text{CH}_2\text{Cl}_2$  ( $3 \times 5$  mL). The combined organic layers were washed with brine, dried over anhydrous  $\text{Na}_2\text{SO}_4$ , filtered, and concentrated under reduced pressure. The residue was purified by flash chromatography on silica gel (eluent:  $\text{EtOAc}/\text{Hexane} = 1:1$ ) to give compound **17** (156 mg, yield: 90%) as a colorless oil.  $[\alpha]_{\text{D}}^{20} +278.1$  ( $c$  1.0,  $\text{CHCl}_3$ ); IR (film)  $\nu_{\text{max}}$ : 2976, 2929, 2853, 1770, 1697, 1453, 1366, 1168, 1120, 1042,  $\text{cm}^{-1}$ ;  $^1\text{H}$  NMR (500 MHz,  $\text{CDCl}_3$ , mixture of rotamers)  $\delta$  1.45 and 1.48 (br 2s, 9H), 1.89-2.00 (m, 1H), 2.22 (dd,  $J = 13.0, 5.4$  Hz, 1H), 3.42 (ddd,  $J = 17.1, 11.1, 6.0$  Hz, 1H), 3.56-3.88 (m, 3H), 4.00-4.36 (m, 2H), 4.51 (d,  $J = 12.2$  Hz, 1H), 4.55 (d,  $J = 12.2$  Hz, 1H), 4.81-4.88 (m, 1H), 7.23-7.36 (m, 5H);  $^{13}\text{C}$  NMR (125 MHz,  $\text{CDCl}_3$ , mixture of rotamers)  $\delta$  28.3, 29.7, 31.3, 32.1, 44.8, 45.5, 60.4, 62.3, 69.1, 73.4, 73.7, 80.4, 81.2, 81.3, 127.5, 127.6, 127.7, 128.4, 173.6, 153.9, 154.2, 176.7, 208.0, 208.5; HRMS calcd for  $\text{C}_{19}\text{H}_{25}\text{NO}_5\text{Na}$   $[\text{M}+\text{Na}]^+$ : 370.1625; found: 370.1624.

***tert*-Butyl (2*S*,3*R*,3*aS*,6*aS*)-3-acetamido-2-((benzyloxy)methyl)tetrahydro-2*H*-furo[3,2-*b*]pyrrole-4(5*H*)-carboxylate (**19**)**

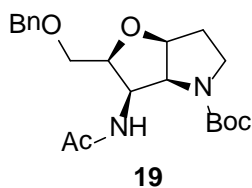

To a solution of compound **17** (173 mg, 0.499 mmol, 1.0 equiv) in anhydrous  $\text{MeOH}$  (5 mL) was added  $\text{NH}_3$  (7 N in  $\text{MeOH}$ , 0.70 mL, 5.0 mmol, 10.0 equiv) and  $\text{Ti}(\text{OPr-}i)_4$  (0.44 mL, 1.50 mmol, 3.0 equiv) dropwise. After being stirred for 10 h at the room temperature, the reaction was cooled to  $-20\text{ }^{\circ}\text{C}$  and  $\text{NaBH}_4$  (57 mg, 1.50 mmol, 3.0 equiv) was added. After being stirred for 30 min at  $-20\text{ }^{\circ}\text{C}$ , the reaction was warmed to  $0\text{ }^{\circ}\text{C}$  and stirred for 2 h. Then the reaction was quenched with  $\text{H}_2\text{O}$  (3

mL) and the aqueous layer was extracted with EtOAc (3 × 10 mL). The combined organic layers were washed with brine, dried over anhydrous Na<sub>2</sub>SO<sub>4</sub>, filtered, and concentrated under reduced pressure. The resulting product was used in the next step without further purification.

The above-mentioned product was dissolved in anhydrous CH<sub>2</sub>Cl<sub>2</sub> (10 mL) at 0 °C was added Et<sub>3</sub>N (0.21 mL, 1.50 mmol, 3.0 equiv) and Ac<sub>2</sub>O (0.10 mL, 1.00 mmol, 2.0 equiv) dropwise. After being stirred for 10 min at 0 °C, the reaction mixture was heated to 38 °C and stirred for 10 h. Then the reaction was quenched with a saturated aqueous NaHCO<sub>3</sub> (3 mL) and the aqueous layer was extracted with CH<sub>2</sub>Cl<sub>2</sub> (3 × 10 mL). The combined organic layers were washed with brine, dried over anhydrous Na<sub>2</sub>SO<sub>4</sub>, filtered, and concentrated under reduced pressure. The residue was purified by flash chromatography on silica gel (eluent: EtOAc/ Hexane = 3:1) to give compound **19** (146 mg, yield: 75%) as a colorless oil. [ $\alpha$ ]<sub>D</sub><sup>20</sup> +90.7 (c 1.0, CHCl<sub>3</sub>); IR (film)  $\nu_{\max}$ : 3323, 2976, 2929, 1697, 1539, 1297, 1478, 1454, 1404, 1366, 1334, 1238, 1168, 1112, 993, 738 cm<sup>-1</sup>; <sup>1</sup>H NMR (500 MHz, CDCl<sub>3</sub>, mixture of rotamers)  $\delta$  1.42 (s, 9H), 1.85-2.13 (m, 5H), 3.16-3.38 (m, 1H), 3.39-3.80 (m, 2.42H), 3.80-3.99 (m, 1.32H), 4.16-4.29 (m, 0.27H), 4.43-4.57 (m, 4H), 4.67-4.95 (m, 1H), 5.47 (br s, 0.62H), 6.65 (br s, 0.27H), 7.26-7.37 (m, 5H); <sup>13</sup>C NMR (125 MHz, CDCl<sub>3</sub>, mixture of rotamers)  $\delta$  23.4, 28.2, 30.3, 30.6, 45.7, 46.3, 52.8, 54.7, 64.1, 65.6, 68.7, 73.7, 79.6, 80.4, 80.8, 81.3, 81.9, 83.1, 127.8, 128.4, 130.9, 137.8, 154.2, 155.7, 169.2, 170.1; HRMS calcd for C<sub>21</sub>H<sub>30</sub>N<sub>2</sub>O<sub>5</sub>Na [M+Na]<sup>+</sup>: 413.2047; found: 413.2051.

***tert*-Butyl (2*S*,3*R*,3*aS*,6*aS*)-3-acetamido-2-(hydroxymethyl)tetrahydro-2*H*-furo [3,2-*b*]pyrrole-4(5*H*)-carboxylate (**20**)**

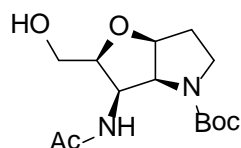

**20**

To a mixture of the 20% Pd(OH)<sub>2</sub>/C (29 mg, 20% wt) in MeOH (3 mL) was added **19** (146 mg, 0.374 mmol, 1.0 equiv) in MeOH (2 mL) dropwise. The reaction vessel was



degassed under vacuum and thoroughly purged with hydrogen. The mixture was stirred under hydrogen atmosphere for 8 h, the catalyst was filtered off. The filter was washed with MeOH (2× 10 mL), dried with Na<sub>2</sub>SO<sub>4</sub>, filtered and concentrated under reduced pressure. The residue was purified by flash chromatography on silica gel (eluent: EtOAc/ MeOH = 10:1) to give the **20** (110 mg, yield: 98%) as a white solid. Mp: 166-168 °C; [ $\alpha$ ]<sub>D</sub><sup>20</sup> +103.1 (*c* 1.0, CHCl<sub>3</sub>); IR (film)  $\nu_{\text{max}}$ : 3339, 2966, 2929, 2855, 1697, 1678, 1550, 1408, 1367, 1258, 1167, 1117, 1095, 1041, 800 cm<sup>-1</sup>; <sup>1</sup>H NMR (500 MHz, CDCl<sub>3</sub>, mixture of rotamers)  $\delta$  1.34-1.50 (m, 9H), 1.89-2.10 (m, 5H), 2.57-3.37 (m, 2H), 3.50-3.98 (m, 4H), 4.43-4.70 (m, 3H), 5.72 and 6.01 (br 2s, 0.7H), 6.54 and 6.79 (br 2s, 0.3H); <sup>13</sup>C NMR (125 MHz, CDCl<sub>3</sub>, mixture of rotamers)  $\delta$  23.2, 28.2, 29.7, 30.2, 31.9, 46.1, 52.9, 54.4, 60.0, 61.9, 64.1, 80.7, 82.0, 82.8, 154.3, 171.4, 174.9; HRMS calcd for C<sub>14</sub>H<sub>24</sub>N<sub>2</sub>O<sub>5</sub>Na [M+Na]<sup>+</sup>: 323.1577; found: 323.1580.

**(+)-*N*-acetyl norlooline (3)**

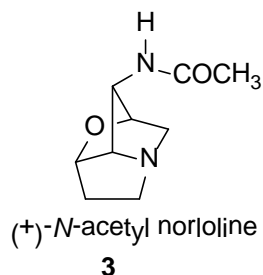

To a solution of compound **20** (30 mg, 0.10 mmol, 1.0 equiv) in anhydrous CH<sub>2</sub>Cl<sub>2</sub> (3 mL) at -20 °C were added Et<sub>3</sub>N (15  $\mu$ L, 0.11 mmol, 1.1 equiv), after 5 min at the same temperature was added MsCl (8  $\mu$ L, 0.10 mmol, 1.0 equiv) in anhydrous CH<sub>2</sub>Cl<sub>2</sub> (0.2 mL). The reaction mixture was stirred at the same temperature until TLC indicated complete consumption of starting material, then was added TFA (0.3 mL) dropwise at -20 °C. After being stirred for 10 min at the same temperature, the reaction was allowed to warm to room temperature and stirred for 2 h which the starting material has been exhausted as monitored by TLC. The reaction mixture was concentrated under stream of argon gas over 1 h. The resulting residue was dissolved in MeCN (4 mL) and K<sub>2</sub>CO<sub>3</sub> (83 mg, 0.60 mmol, 6.0 equiv) was added, the mixture was stirred at room temperature for 10 h under argon atmosphere. The K<sub>2</sub>CO<sub>3</sub> was

filtered off, and the organic phase was concentrated under reduced pressure. The residue was purified by flash chromatography on silica gel (eluent: CHCl<sub>3</sub> / MeOH = 10:1) to give (+)-*N*-acetyl norloline (**3**) (14 mg, yield: 80%) as a colorless oil.  $[\alpha]_{\text{D}}^{20} +48.7$  (*c* 0.5, CHCl<sub>3</sub>) {lit.<sup>[3]</sup>  $[\alpha]_{\text{D}}^{20} +49.8$  (*c* 2.23, CHCl<sub>3</sub>)}; IR (film)  $\nu_{\text{max}}$ : 3430, 2962, 2847, 1642, 1386, 1260, 1094, 1021 cm<sup>-1</sup>; <sup>1</sup>H NMR (600 MHz, CDCl<sub>3</sub>)  $\delta$  4.43 (dd, *J* = 4.6, 1.7 Hz, 1H), 4.41 (dd, *J* = 5.6, 1.4 Hz, 1H), 4.17 (d, *J* = 1.1 Hz, 1H), 3.31 (d, *J* = 11.9 Hz, 1H), 3.15 (m, 1H), 3.09 (ddd, *J* = 12.5, 8.5, 3.2 Hz, 1H), 2.93 (ddd, *J* = 12.5, 9.2, 7.3 Hz, 1H), 2.43 (d, *J* = 11.9 Hz, 1H), 1.98 (dddd, *J* = 14.4, 9.4, 4.3, 3.4 Hz, 1H), 1.95 (s, 3H); <sup>13</sup>C NMR (150 MHz, CDCl<sub>3</sub>)  $\delta$  170.5, 80.8, 73.8, 69.7, 61.0, 57.6, 54.5, 33.6, 23.1; HRMS calcd for C<sub>9</sub>H<sub>15</sub>N<sub>2</sub>O<sub>2</sub> [M+H]<sup>+</sup>: 183.1128; found: 183.1126.

**Table 1.** Comparison of  $^1\text{H}$  NMR data of synthetic and natural samples of (+)-*N*-acetyl norlooline

| $^1\text{H}$ NMR<br>(400 MHz, $\text{CDCl}_3$ )                                            |                                                                                         | $^1\text{H}$ NMR<br>(600 MHz, $\text{CDCl}_3$ )  |
|--------------------------------------------------------------------------------------------|-----------------------------------------------------------------------------------------|--------------------------------------------------|
| synthetic ( $\pm$ )- <i>N</i> -acetyl<br>norlooline reported by<br>Scheerer <sup>[4]</sup> | semi-synthetic<br>(+)- <i>N</i> -acetyl norlooline<br>reported by Powell <sup>[5]</sup> | this work                                        |
| 4.46-4.48 (dd, $J = 4.4, 1.9$<br>Hz, 1H)                                                   | 4.44 (dd, $J = 4.3, 1.3$ Hz,<br>1H)                                                     | 4.43 (dd, $J = 4.6, 1.7$ Hz,<br>1H)              |
| 4.44 (m, 1H)                                                                               | 4.41 (dd, $J = 2.5, 1.6$ Hz,<br>1H)                                                     | 4.41 (dd, $J = 5.6, 1.4$ Hz,<br>1H)              |
| 4.18 (m, 1H)                                                                               | 4.17 (dd, $J = 2.5, 1.0$ Hz,<br>1H)                                                     | 4.17 (d, $J = 1.1$ Hz, 1H)                       |
| 3.30-3.33 (d, $J = 11.9$ Hz,<br>1H)                                                        | 3.29 (dd, $J = 11.8, 1.0$ Hz,<br>1H)                                                    | 3.31 (d, $J = 11.9$ Hz, 1H)                      |
| 3.12 (m, 1H)                                                                               | 3.10 (ddd, $J = 12.8, 8.3,$<br>3.6 Hz, 1H)                                              | 3.09 (ddd, $J = 12.5, 8.3,$<br>3.4 Hz, 1H)       |
| 3.10-3.15 (m, $J = 3.5$ Hz,<br>1H)                                                         | 3.09 (dd, $J = 1.9, 1.6$ Hz,<br>1H)                                                     | 3.15 (m, 1H)                                     |
| 2.89 (m, $J = 12.8, 9.4$ Hz,<br>1H)                                                        | 2.90 (ddd, $J = 12.8, 9.3,$<br>7.4 Hz, 1H)                                              | 2.93 (ddd, $J = 12.5, 9.2,$<br>7.3 Hz, 1H)       |
| 2.43-2.46 (d, $J = 12.1$ Hz,<br>1H)                                                        | 2.42 (d, $J = 11.8$ Hz, 1H)                                                             | 2.43 (d, $J = 11.9$ Hz, 1H)                      |
| 2.02-2.14 (m, 2H)                                                                          | 2.08 (ddd, $J = 14.4, 8.3,$<br>7.4 Hz, 1H)                                              | 2.07 (ddd, $J = 14.4, 8.3$ Hz,<br>7.3 Hz, 1H)    |
|                                                                                            | 1.98 (dddd, $J = 14.4, 9.3,$<br>4.3, 3.6 Hz, 1H)                                        | 1.98 (dddd, $J = 14.4, 9.4,$<br>4.3, 3.4 Hz, 1H) |
| 1.99 (s, 3H)                                                                               | 1.97 (s, 3H)                                                                            | 1.95 (s, 3H)                                     |

**Table 2.** Comparison of  $^{13}\text{C}$  NMR data of synthetic and natural samples of (+)-*N*-acetyl norlooline

| $^{13}\text{C}$ NMR<br>(100 MHz, $\text{CDCl}_3$ )                                         |                                                                                         | $^{13}\text{C}$ NMR<br>(150 MHz, $\text{CDCl}_3$ ) |
|--------------------------------------------------------------------------------------------|-----------------------------------------------------------------------------------------|----------------------------------------------------|
| synthetic ( $\pm$ )- <i>N</i> -acetyl<br>norlooline reported by<br>Scheerer <sup>[4]</sup> | semi-synthetic<br>(+)- <i>N</i> -acetyl norlooline<br>reported by Powell <sup>[5]</sup> | this work                                          |
| 170.29                                                                                     | 170.2                                                                                   | 170.5                                              |
| 80.96                                                                                      | 80.9                                                                                    | 80.8                                               |
| 73.75                                                                                      | 73.8                                                                                    | 73.8                                               |
| 69.67                                                                                      | 69.6                                                                                    | 69.7                                               |
| 60.94                                                                                      | 60.9                                                                                    | 61.0                                               |
| 57.56                                                                                      | 57.6                                                                                    | 57.6                                               |
| 54.61                                                                                      | 54.6                                                                                    | 54.5                                               |
| 33.87                                                                                      | 33.9                                                                                    | 33.6                                               |
| 23.21                                                                                      | 23.1                                                                                    | 23.1                                               |

## References:

1. G. Rassu, G. Casiraghi, P. Spanu, L. Pinna, G. G. Fava, M. B. Ferrari and G. Pelosi, *Tetrahedron: Asymmetry*, 1992, **3**, 1035-1048.
2. F. Zanardi, L. Battistini, M. Nespi, G. Rassu, P. Spanu, M. Cornia and G. Casiraghi, *Tetrahedron: Asymmetry*, 1996, **7**, 1167-1180.
3. E. K. Batirov, S. A. Khamidkhodzhaev, V. M. Malikov and S. Y. Yunusov, *Khim. Prir. Soedin.*, 1976, 60-63.
4. M. T. Hovey, E. J. Eklund, R. D. Pike, A. A. Mainkar and J. R. Scheerer, *Org. Lett.*, 2011, **13**, 1246-1249.
5. R. J. Petroski, S. G. Yates, D. Weisleder and R. G. Powell, *J. Nat. Prod.*, 1989, **52**, 810-817.

# $^1\text{H}$ and $^{13}\text{C}$ NMR spectra of compound 9

LY-D73-SHUJU-H1  
400MZ CDCl<sub>3</sub>  
2015.03.14

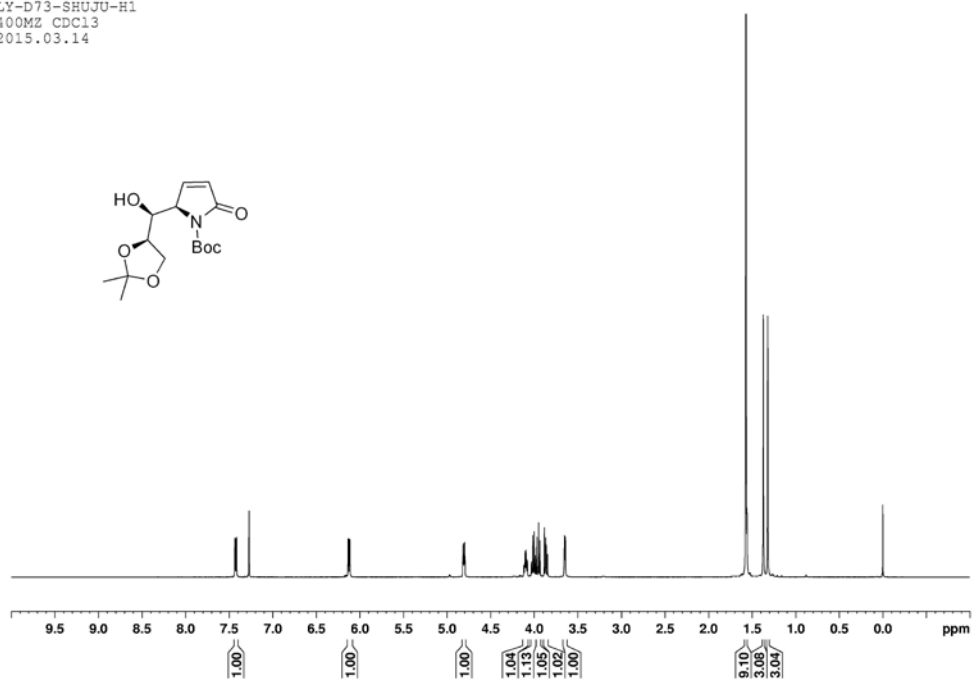

LY-D73-SHUJU-C13  
100MZ CDCl<sub>3</sub>  
2015.03.14

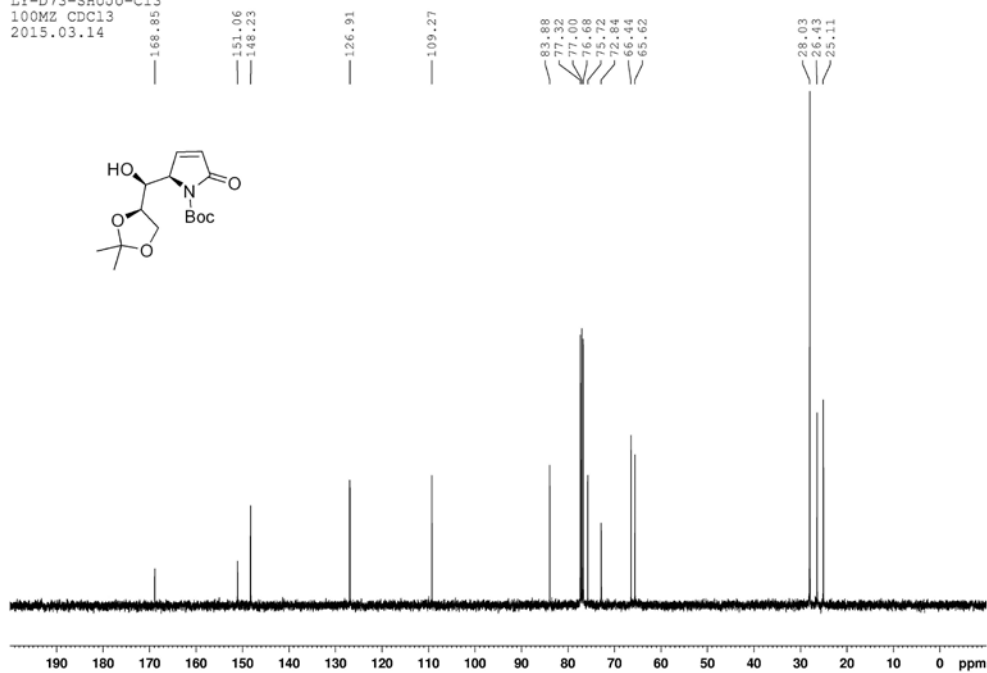

# <sup>1</sup>H and <sup>13</sup>C NMR spectra of compound 11

LY-D84-H1  
400MZ CDCl3  
2015.01.26

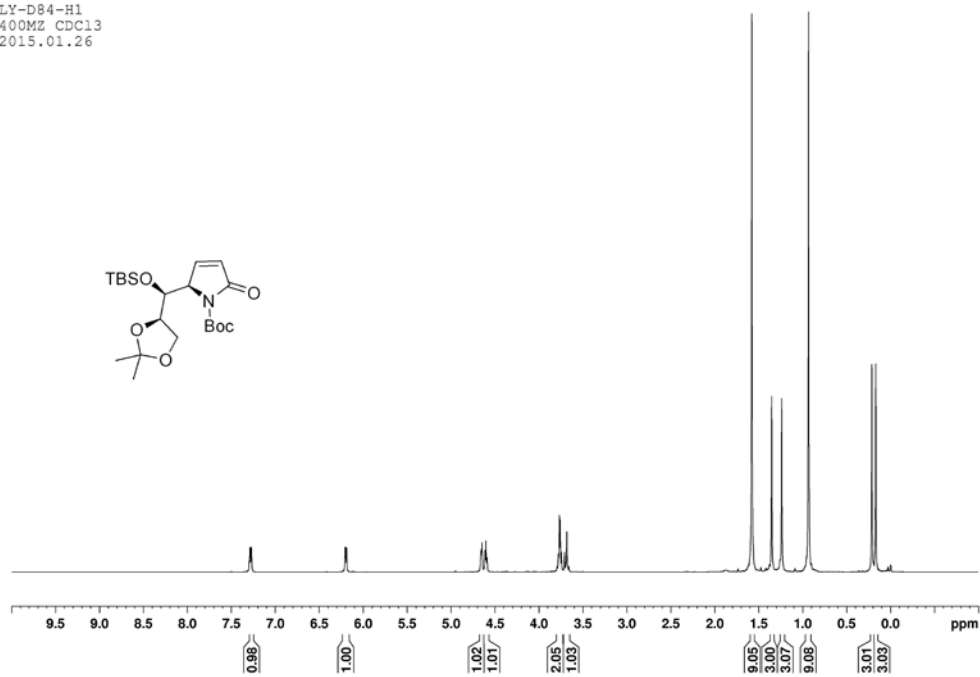

LY-D84-C13  
100MZ CDCl3  
2015.01.26

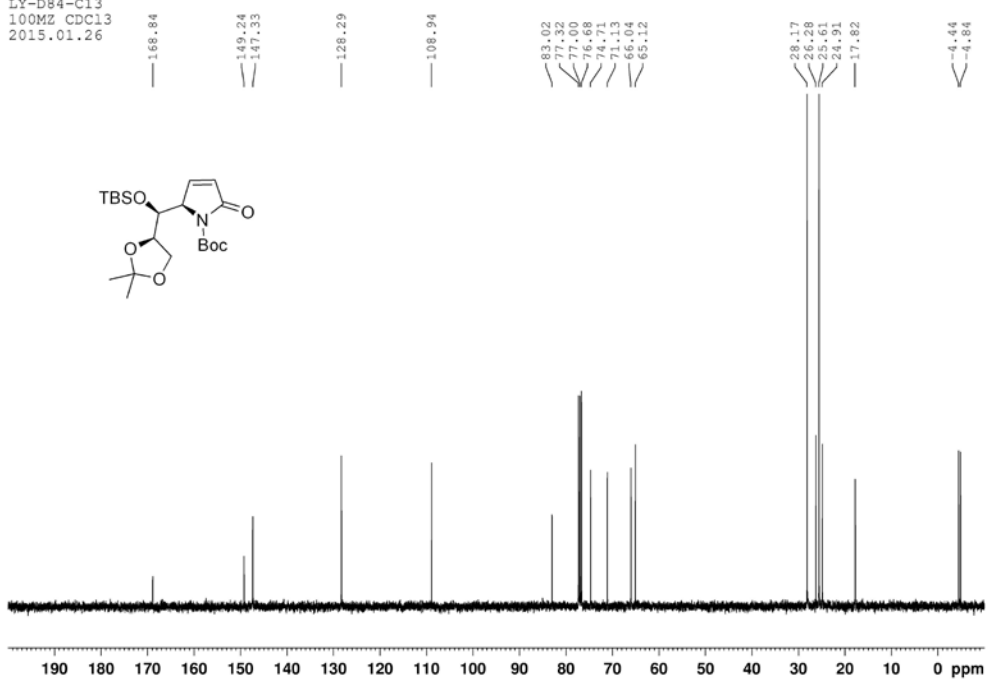

# $^1\text{H}$ and $^{13}\text{C}$ NMR spectra of compound 13

LY-D91-SHUJU-H1  
400MHz CDCl<sub>3</sub>  
2015.01.25

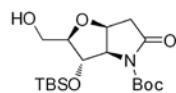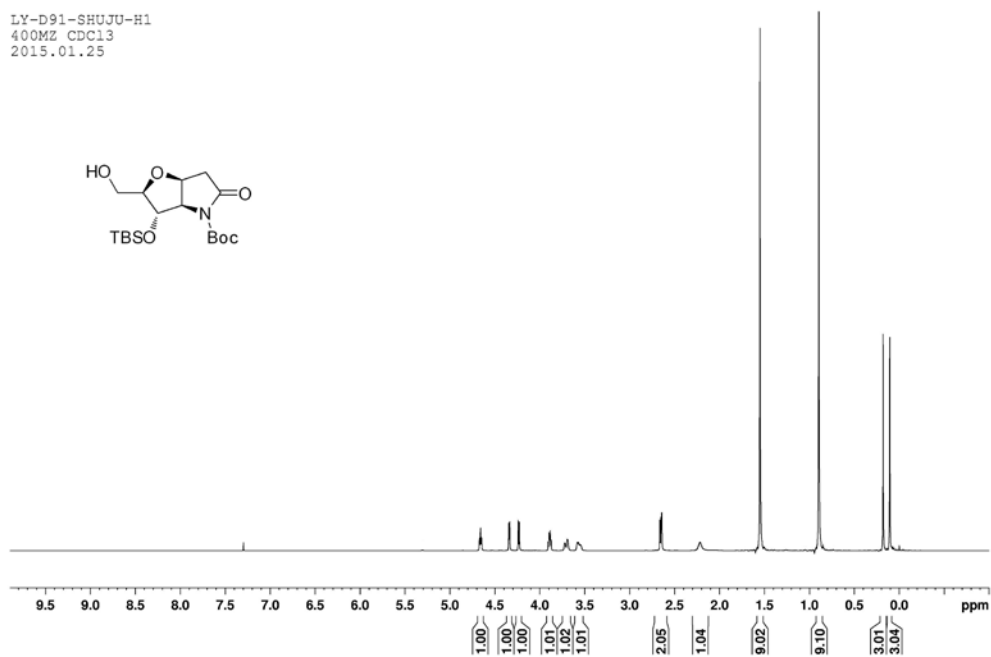

LY-D91-SHUJU-C13  
CDCl<sub>3</sub>  
2015.01.25

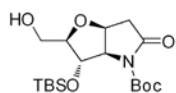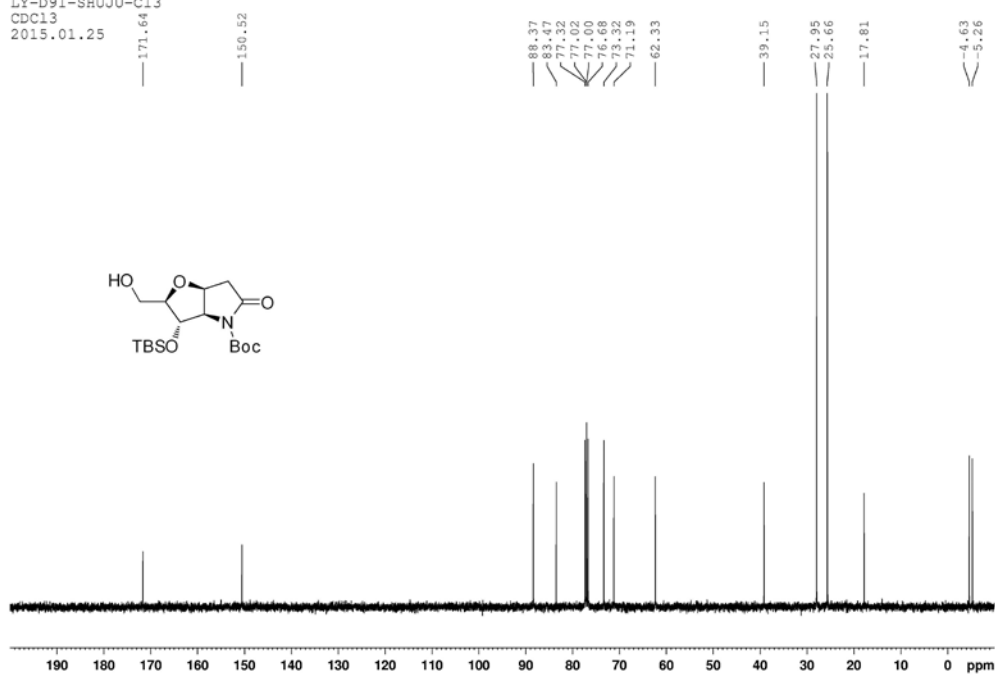



# $^1\text{H}$ and $^{13}\text{C}$ NMR spectra of compound 14

LY-D137NMR  
500 MHz,  $\text{CDCl}_3$

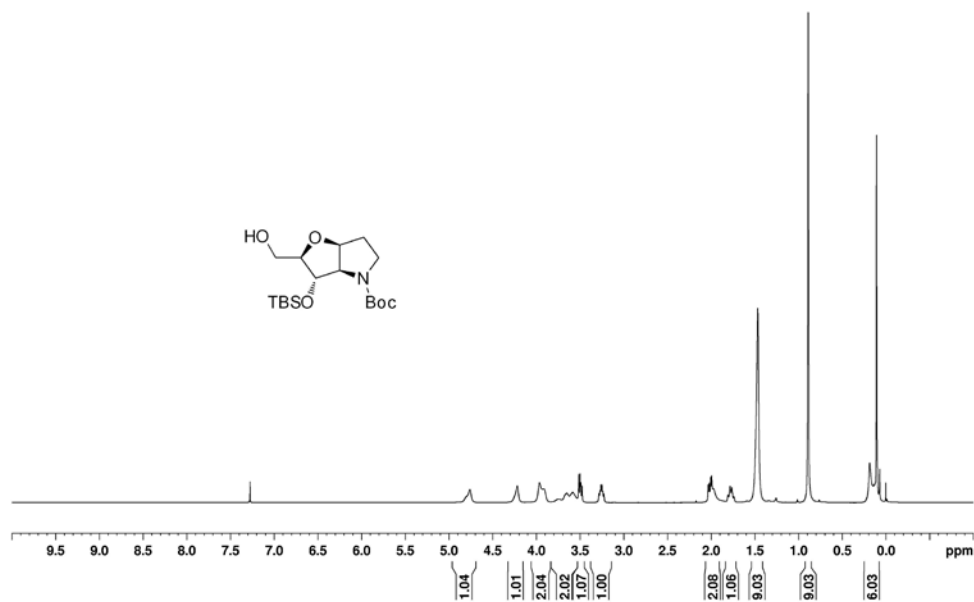

LY-D137-C13  
 $\text{CDCl}_3$

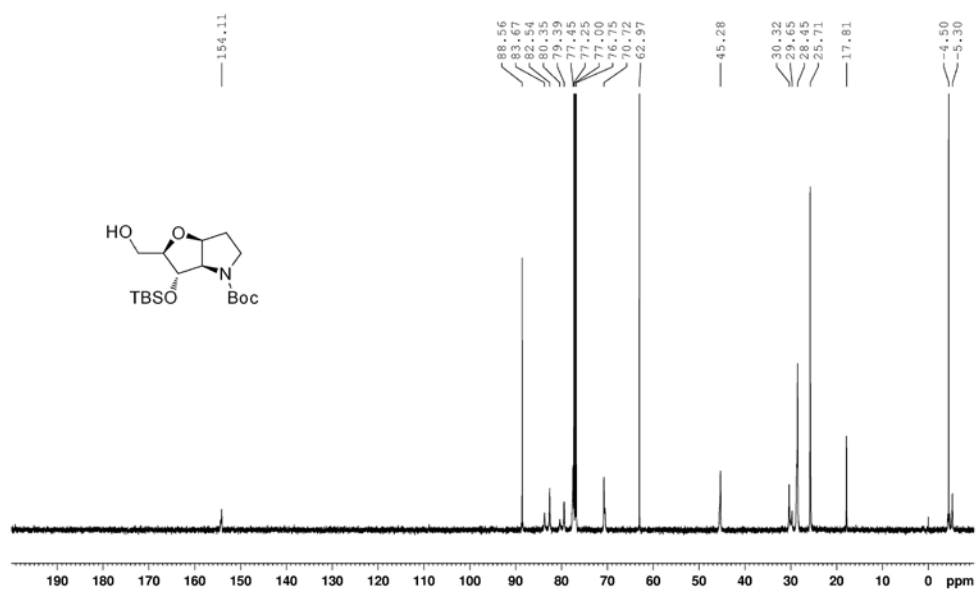

# <sup>1</sup>H and <sup>13</sup>C NMR spectra of compound 15

LY-D138-H  
500MHz CDCl<sub>3</sub>

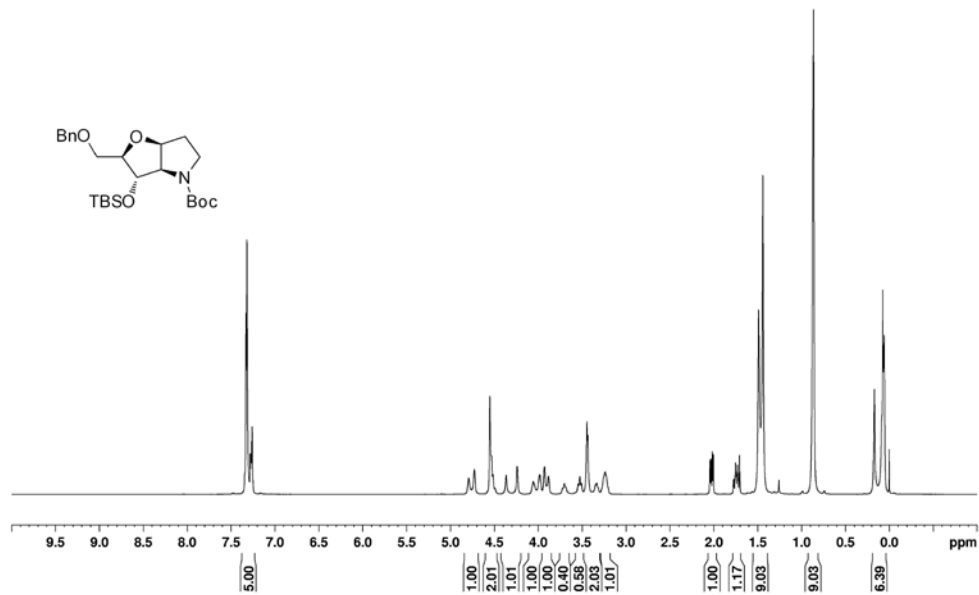

LY-D138-C  
CDCl<sub>3</sub>

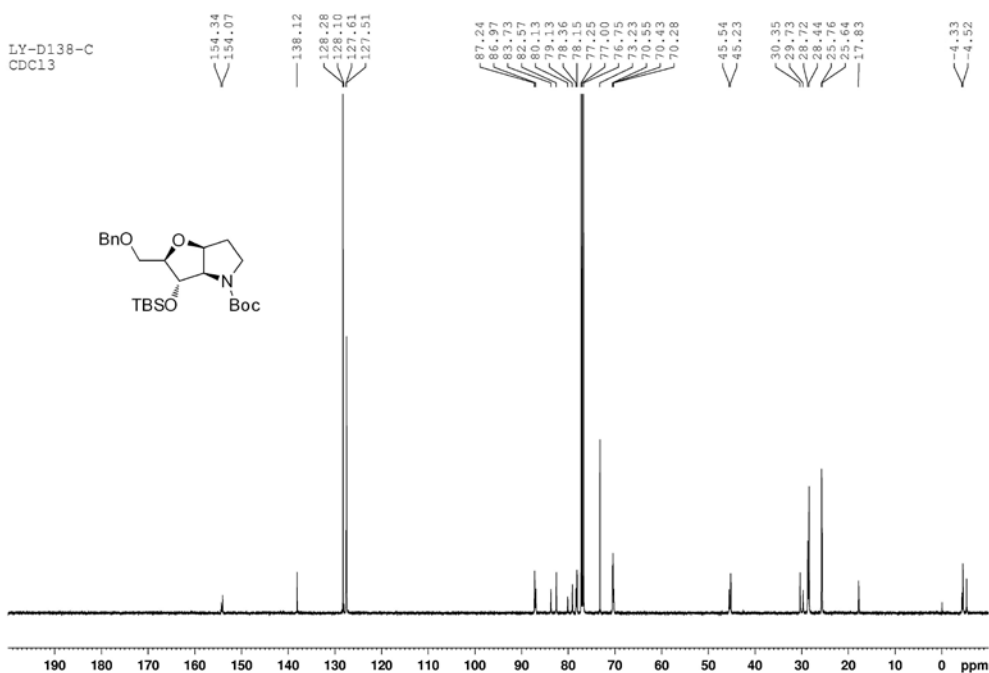

# $^1\text{H}$ and $^{13}\text{C}$ NMR spectra of compound 16

LY-D139-H1  
CDCl<sub>3</sub>

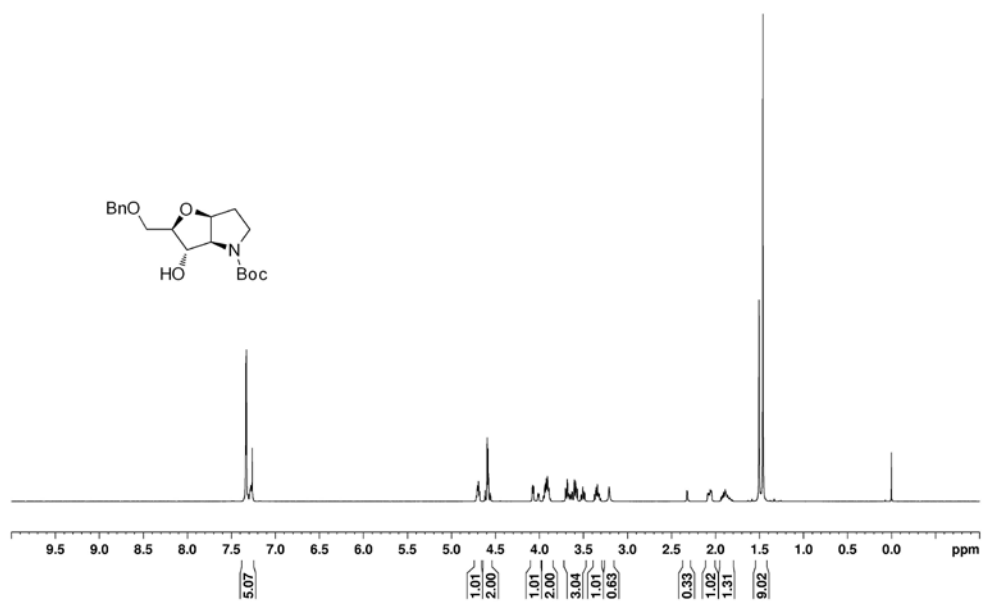

LY-D139-C13  
CDCl<sub>3</sub>

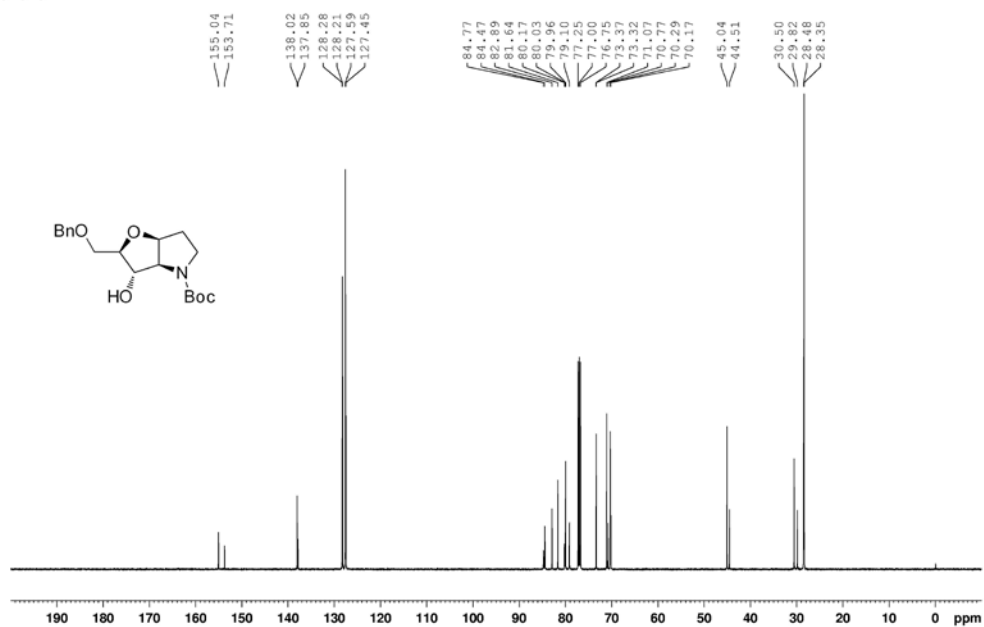

# <sup>1</sup>H and <sup>13</sup>C NMR spectra of compound 17

LY-D140-H  
500MHz CDCl<sub>3</sub>

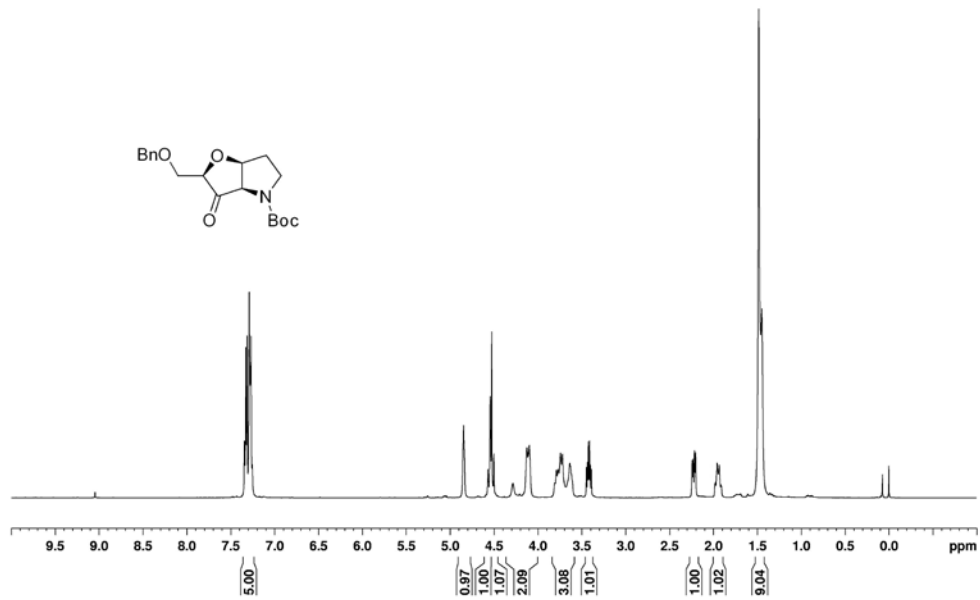

LY-D140-C13  
CDCl<sub>3</sub>

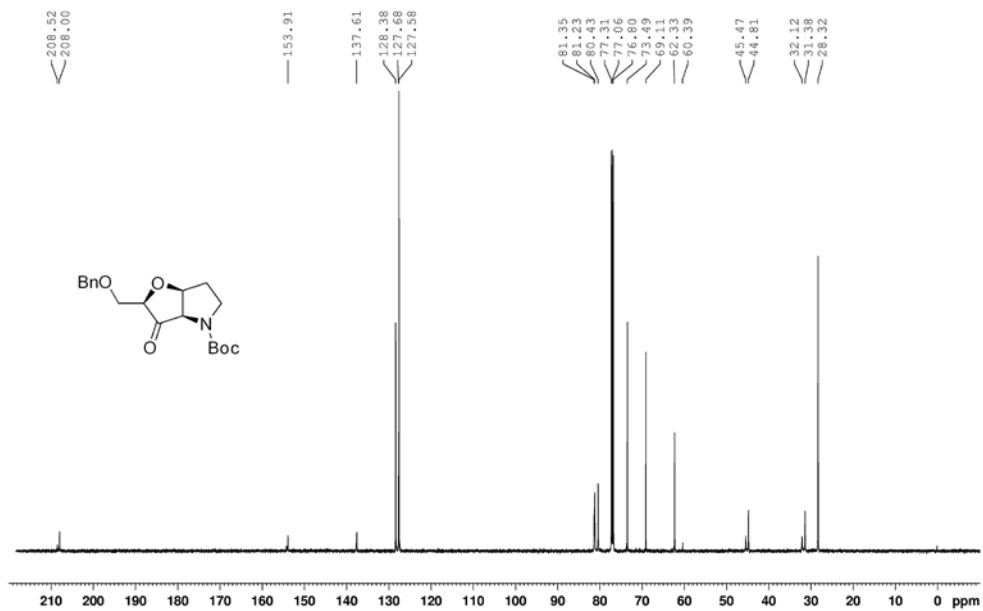

# $^1\text{H}$ and $^{13}\text{C}$ NMR spectra of compound 19

LY-E13-H  
500MHz CDCl<sub>3</sub>

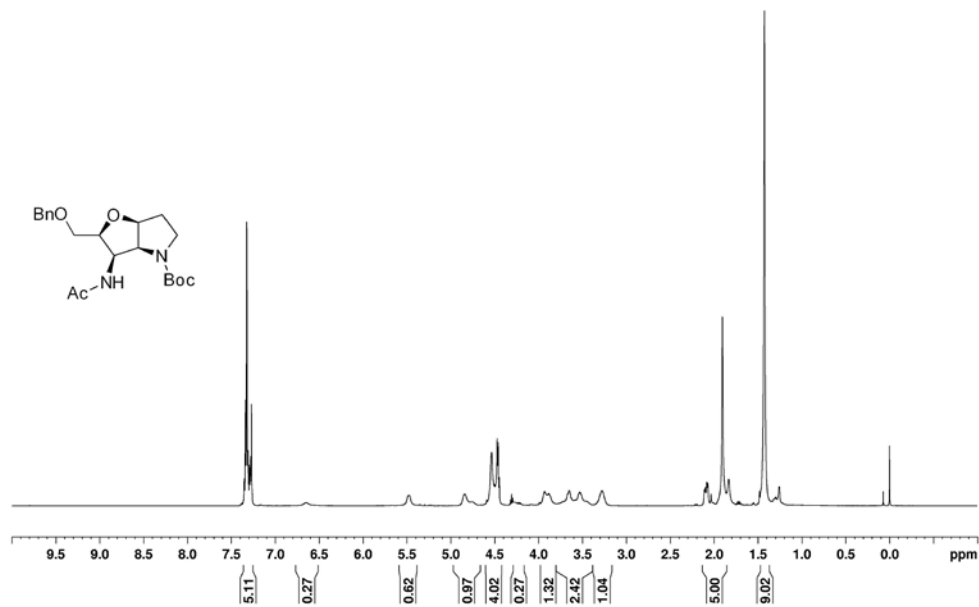

LY-E13-C  
CDCl<sub>3</sub>

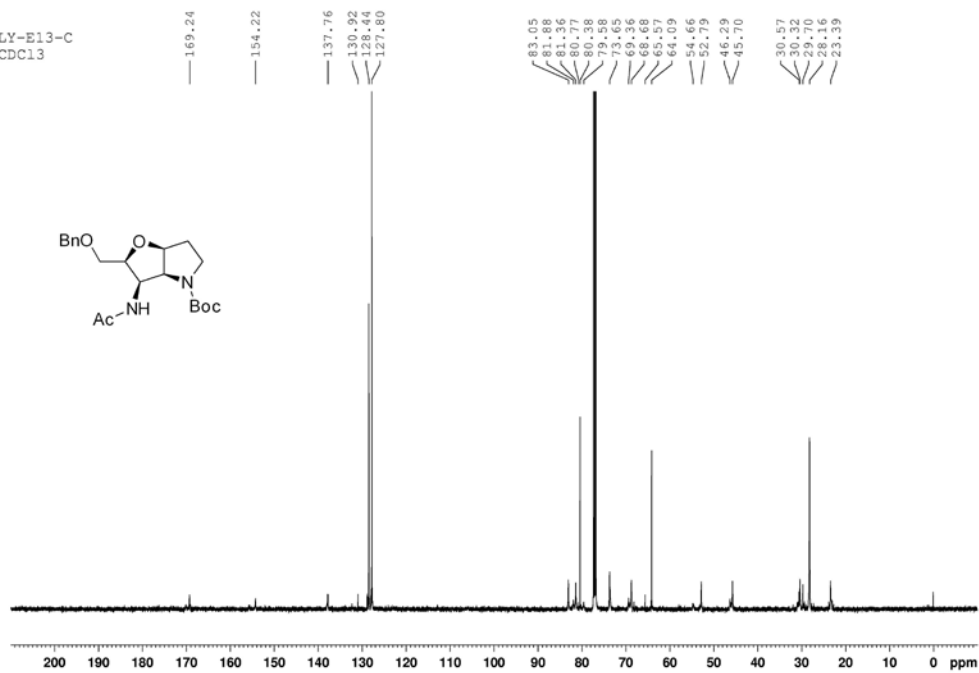

# <sup>1</sup>H and <sup>13</sup>C NMR spectra of compound 20

LY-E14-H  
500MHz CDCl<sub>3</sub>

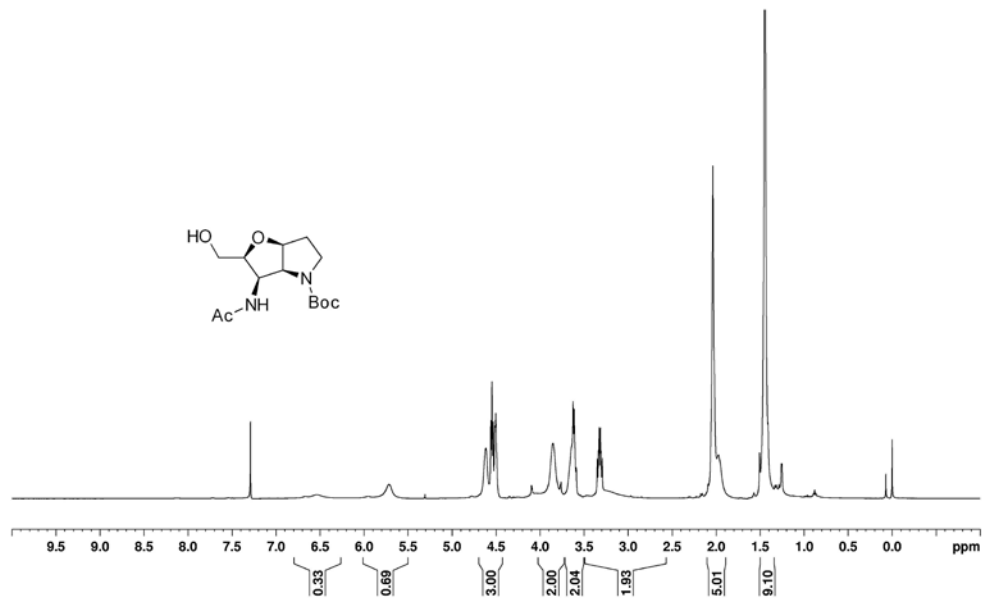

LY-E14-C13  
CDCl<sub>3</sub>

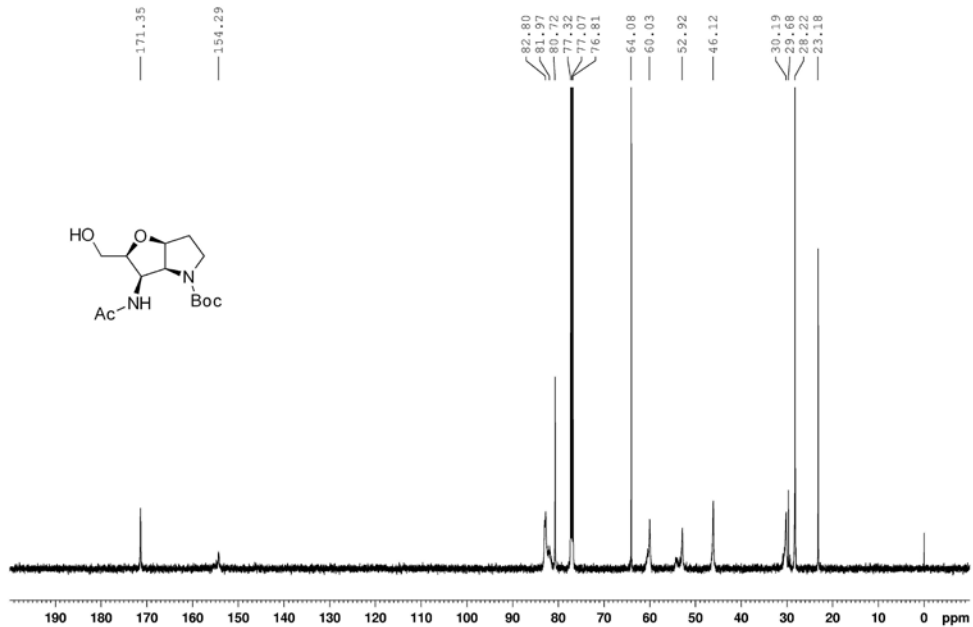

# <sup>1</sup>H and <sup>13</sup>C NMR spectra of compound (+)-N-acetyl norlooline (3)

Sample: LY-E17  
Solvent: CDCl<sub>3</sub>

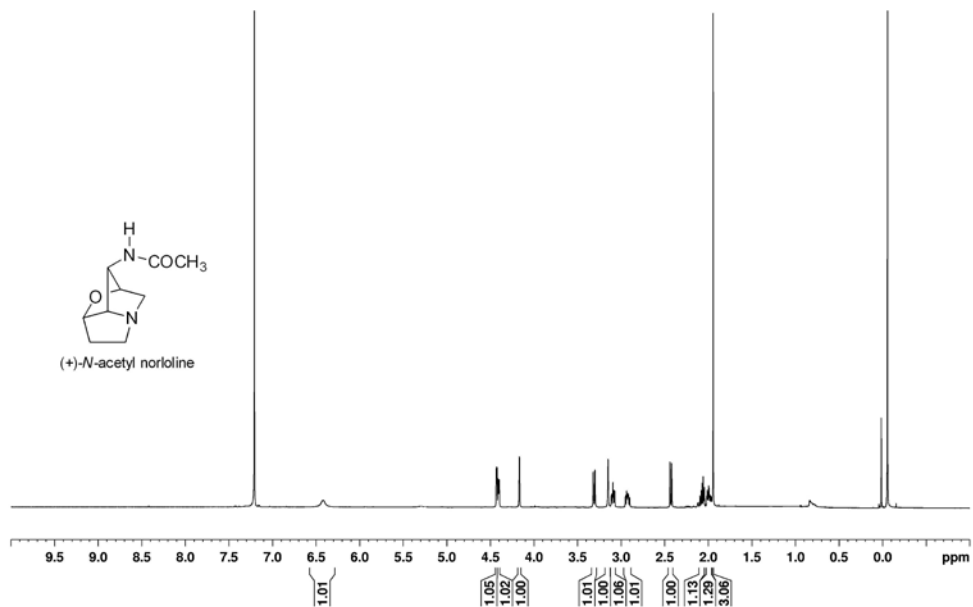

Sample: LYE-17  
Solvent: CDCl<sub>3</sub>

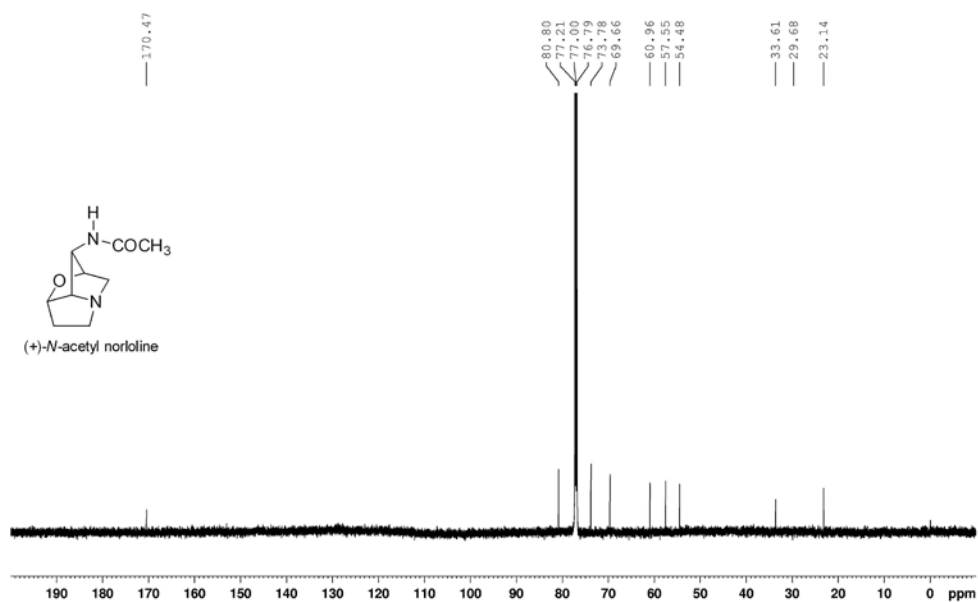

X-ray structure of compound **13**

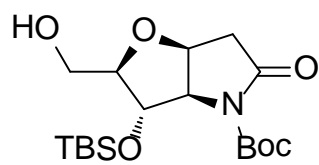

**13**

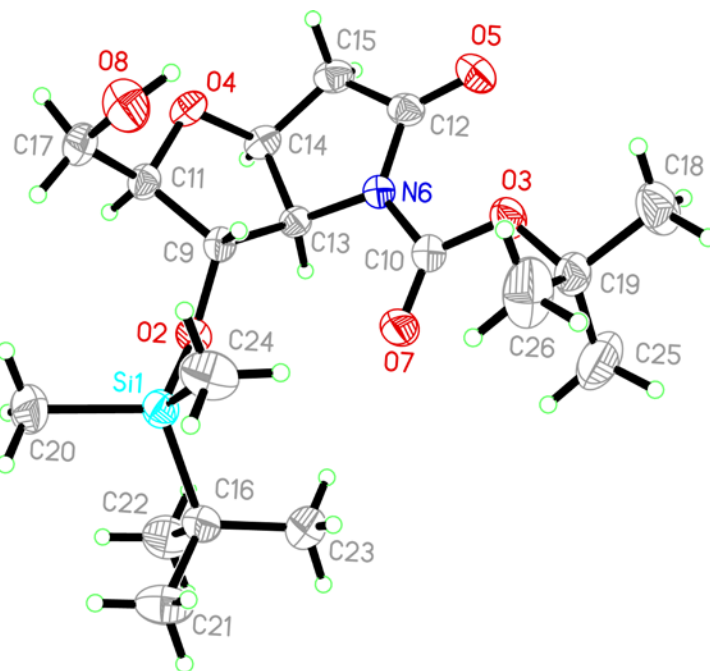

Supplement: c5cc07480k1.pdf [file c5cc07480k1.pdf]
